# Supplementary material
Source: HighWire-hosted journal article supplement (http://www.jneurosci.org/highwire/filestream/600161/field_highwire_adjunct_files/3/Supplemental_Legend.pdf)
Supplement: Supplemental_Legend.pdf [file Supplemental_Legend.pdf]

**Supplemental Figure 1.** Aversion indices for unconditioned mice. The aversion indices during extinction test for unconditioned mice were measured for 8 consecutive days.

**Supplemental Figure 2.** **A.** Low-magnification representative photomicrograph of c-Fos immunohistochemistry in vmPFC. Discontinuous lines indicate the boundaries of the vmPFC. Scale bar=400  $\mu$ m. **B.** Representative photomicrograph of c-Fos-labeled cells in the vmPFC in sodium saccharin (SAC) control groups. Scale bar=100  $\mu$ m. **C.** Representative photomicrograph of c-Fos-labeled cells in the hippocampus in sodium saccharin (SAC) control groups. Scale bar=1000  $\mu$ m.

**Supplemental Figure 3.** CTA acquisition to different LiCl doses at 0.075M, 0.15M, and 0.2M LiCl. Within each of the three dosage groups, there is no main effect of genotype on aversion index (AI), showing similar baseline aversion across genotypes. There was a significant main effect of dosage (ANOVA,  $F_{(2,63)} = 158.14$ ,  $p < 0.001$ ) with each dose leading to a significant increase in aversion index (AI). All results are presented as means  $\pm$  SEM determined from analysis of 5-6 mice per genotype (\*\* $p < 0.01$ ).
